# Supplementary material for: Sortilin inhibition treats multiple neurodegenerative lysosomal storage disorders
Source: PubMed Central journal article supplement — bioRxiv. 2023 Sep 22:2023.09.22.559064. Preprint. [Version 1] doi: 10.1101/2023.09.22.559064 (PMC10543011; doi:10.1101/2023.09.22.559064), 2023-09-22

**Supplemental Figure 1 - Inhibition of sortilin through ART1001 (40 nM, 400 nM, 4µM) impacts the accumulation of ASM and LysoTracker in cell models of Batten disease.** Mouse embryonic fibroblasts (MEFs) were isolated from *Cln1*<sup>R151X</sup>, *Cln2*<sup>R207X</sup>, *Cln3*<sup>Δex7/8</sup>, *Cln6*<sup>ncif</sup>, and *Cln8*<sup>mnd</sup> mouse lines. *Cln11*<sup>-/-</sup> fibroblasts were isolated from adult *Cln11*<sup>-/-</sup> mice All cell lines were dosed with drug-containing media on DIV3 and DIV5 and analyzed on DIV7 using the CellInsight CX7 High-Content Screening Platform (CX7) (A-F) Upon treatment with ART1001 (40 nM, 400 nM, 4 µM) ASM accumulation was reduced in WT, *Cln1*<sup>R151X</sup>, *Cln2*<sup>R207X</sup>, *Cln3*<sup>Δex7/8</sup>, *Cln6*<sup>ncif</sup>, and *Cln8*<sup>mnd</sup> MEFs and (G) increased in *Cln11*<sup>-/-</sup> MEFs. (H-J, L-M) Treatment with ART1001 (40 nM, 400 nM, 4 µM) decreased the LysoTracker accumulation in WT, *Cln1*<sup>R151X</sup>, *Cln2*<sup>R207X</sup>, *Cln6*<sup>ncif</sup>, *Cln8*<sup>mnd</sup>, and *Cln11*<sup>-/-</sup> MEFs. (K) LysoTracker signal was increased in *Cln3*<sup>Δex7/8</sup> MEFs upon treatment with ART1001 (40 nM) and decreased when cells were treated with 400 nM and 4 µM doses (O-U) Treatment with ART1001 (40 nM, 400 nM, 4 µM) had no impact on cellular viability compared to vehicle- treated mutant (S) aside from *Cln6*<sup>ncif</sup> (400 nM) which was reduced. (A-M). Mean ± S.E.M. of % of the total cell area. (O-U) Mean ± S.E.M. of number of cells reflected as valid object count. One-way ANOVA with a Šidák post-hoc test \*/#p<0.05, \*\*/##p<0.01, \*\*\*/###p<0.001, \*\*\*\*/####p<0.0001. Hashsigns indicate comparison to WT, asterisks indicate comparison to mutant vehicle. (A-M) n = 650 – 4500 cells/treatment (O-U) n = 9 wells/treatment. Scale bar, 100 µm.

**Supplemental Figure 2 - Inhibition of sortilin through ART1001 (40 nM, 400 nM, 4µM) impacted the accumulation of ASM and LysoTracker in neuronal cell models of Batten disease.** Primary neuronal cells (PNCs) isolated from *Cln1*<sup>R151X</sup>, *Cln2*<sup>R207X</sup>, *Cln3*<sup>Δex7/8</sup>, *Cln6*<sup>ncif</sup>, and *Cln8*<sup>mnd</sup> mouse lines. All cell lines were dosed with drug-containing media on DIV3 and DIV5 and analyzed on DIV7 using the CellInsight CX7 High-Content Screening Platform (CX7) (A-F) Upon treatment with ART1001 (40 nM, 400 nM, 4µM), ASM accumulation was generally reduced in WT, *Cln1*<sup>R151X</sup>, *Cln2*<sup>R207X</sup>, *Cln3*<sup>Δex7/8</sup>, and *Cln8*<sup>mnd</sup> PNCs; and (E) increased in *Cln6*<sup>ncif</sup> PNCs (b)

Upon treatment with ART1001 (40 nM, 400 nM, 4 $\mu$ M), LysoTracker accumulation was reduced in WT, *Cln1*<sup>R151X</sup>, *Cln6*<sup>ncif</sup> PNCs, and was variably impacted in *Cln2*<sup>R207X</sup>, *Cln3* <sup>$\Delta$ ex7/8</sup>, and *Cln8*<sup>mnd</sup> PNCs. (G-L) Treatment with ART1001 (40 nM, 400 nM, 4 $\mu$ M) had no impact on cellular viability compared to vehicle-treated mutant. (A-L). Mean  $\pm$  S.E.M. of % of the total cell area. (M-R) Mean  $\pm$  S.E.M. of number of cells reflected as valid object count. One-way ANOVA with a Šidák post-hoc test <sup>\*/#</sup>p<0.05, <sup>\*\*/##</sup>p<0.01, <sup>\*\*\*/###</sup>p<0.001, <sup>\*\*\*\*/####</sup>p<0.0001. Hashsigns indicate comparison to WT, asterisks indicate comparison to mutant vehicle. (A-L) n = 4000 - 20000 cells/ treatment (M-R) n = 9 wells/treatment. Scale bar, 100  $\mu$ m, Inset scale bar, 50  $\mu$ m.

**Figure 3 - Sortilin inhibition through ART1001 treatment increases enzyme activity of PPT1 and TPP1 *in cellulo*.** Mouse embryonic fibroblasts (MEFs) were isolated from WT, *Cln2*<sup>R207X</sup>, *Cln3* <sup>$\Delta$ ex7/8</sup>, and *Cln6*<sup>ncif</sup> mouse embryos, and *Cln11*<sup>-/-</sup> fibroblasts were isolated from adult *Cln11*<sup>-/-</sup> mice. Cells were cultured and treated with ART1001 (40nM) on DIV3 and DIV5; the cells were collected on DIV7, and the enzyme activity assays were performed on the cellular lysates. (A-E) Treatment with ART1001 increased PPT1 enzyme activity in all cell lines. (G-J) Treatment with ART1001 increased TPP1 enzyme activity in all cell lines except for (F) *Cln2*<sup>R207X</sup> MEFs. Mean $\pm$  S.E.M. One-way ANOVA with a Šidák post-hoc test \*p <0.05, \*\*p<0.01, \*\*\*p<0.001, \*\*\*\*p<0.0001. n = 3-5 wells/treatment.

**Supplemental Figure 4 - Inhibition of sortilin through short-term treatment with ART1001 impacted histopathological and behavioral outcomes in *Cln2*<sup>R207X</sup> mice.** Homozygous *Cln2*<sup>R207X</sup> and litter mate wild type mice received continuous treatment with ART1001 or vehicle via the drinking water starting at wean until 11 weeks of age. Body weights were measured biweekly until 10 weeks of age when force plate measurements were collected. (A) ART1001 treatment (78  $\mu$ g/ml) in *Cln2*<sup>R207X</sup> mice prevented SubC accumulation and had no impact on microglial reactivity (CD68<sup>+</sup>) or astroglial activation (GFAP<sup>+</sup>) in the S1BF of the somatosensory cortex (B) ART1001 treatment (78  $\mu$ g/ml) in *Cln2*<sup>R207X</sup> mice had no impact of accumulation of

mitochondrial ATP synthase subunit C (SubC<sup>+</sup>), microgliosis (CD68<sup>+</sup>), or astrocytosis (GFAP<sup>+</sup>) in the VPM/VPL of the thalamus. Mean ± S.E.M. Nested one-way ANOVA with a Šidák post-hoc test \*/#p<0.05, \*\*/##p<0.01, \*\*\*/###p<0.001, \*\*\*\*/####p<0.0001. Hashsigns indicate comparison to WT, asterisks indicate comparison to mutant vehicle. n = 7-8 animals/treatment. Scale bar, 100 μm.

**Supplemental Figure 5 - Inhibition of sortilin through short-term treatment with ART1001 impacted histopathological in *Cln3*<sup>Δex7/8</sup> mice.** Homozygous *Cln3*<sup>Δex7/8</sup> and wild type mice received continuous treatment with ART1001 or vehicle via drinking water starting at wean until 16 weeks of age. Body weights were measured monthly. (A) ART1001 treatment (3 μg/ml, 78 μg/ml) in *Cln3*<sup>Δex7/8</sup> mice prevented SubC accumulation and had no impact on microglial reactivity (CD68<sup>+</sup>) or astroglial activation (GFAP<sup>+</sup>) in the S1BF of the somatosensory cortex. (B) ART1001 treatment (3 μg/ml) prevented accumulation of mitochondrial ATP synthase subunit C (SubC<sup>+</sup>) in the VPM/VPL nuclei of the thalamus (3 μg/ml) when compared to vehicle treated mice. Mean ± S.E.M. Nested one-way ANOVA with a Šidák post-hoc test \*/#p<0.05, \*\*/##p<0.01, \*\*\*/###p<0.001, \*\*\*\*/####p<0.0001. Hashsigns indicate comparison to WT, asterisks indicate comparison to mutant vehicle. n = 6-8 animals/treatment. Scale bar, 100 μm.

**Supplemental Figure 6 - Inhibition of sortilin through short-term treatment with ART1001 impacted histopathological and behavioral outcomes in wild type mice.** (A) Wild type mice received continuous treatment with ART1001 or vehicle via drinking water starting at wean until 16 weeks of age. Body weights were measured monthly. (B) Treatment with ART1001 had no impact on PPT1 enzyme activity levels in WT treated mice (C) Treatment with ART1001 increased TPP1 enzyme activity levels in WT treated mice (D-E) ART1001 treatment (3 μg/ml, 78 μg/ml) in WT mice had no impact of accumulation of mitochondrial ATP synthase subunit C (SubC<sup>+</sup>), microgliosis (CD68<sup>+</sup>), or astrocytosis (GFAP<sup>+</sup>) in the S1BF of the somatosensory cortex or the VPM/VPL of the thalamus. (F) Treatment with ART1001 reduced microgliosis (CD68<sup>+</sup>) and had

no impact on SubC accumulation or astrocytosis (GFAP<sup>+</sup>) in the S1BF of the somatosensory cortex. (G) Treatment with ART1001 reduced SubC accumulation, microgliosis (CD68<sup>+</sup>), and astrocytosis (GFAP<sup>+</sup>) in the VPM/CVPL of the thalamus. Mean ± S.E.M. Nested one-way ANOVA with a Šidák post-hoc test \*/#p<0.05, \*\*/##p<0.01, \*\*\*/###p<0.001, \*\*\*\*/####p<0.0001. Hashsigns indicate comparison to WT, asterisks indicate comparison to mutant vehicle. n = 6-8 animals/treatment. Scale bar, 100 μm.

**Supplemental Figure 8** Body weights measured at timepoints indicated along X axis. (A) ART1001 treated *Cln2*<sup>R207X</sup> mice (B) ART1001 treated *Cln3*<sup>Δex7/8</sup> mice and (C) ART1001 treated wild type mice. Mean ± S.E.M. Two-way ANOVA with Dunnett's multiple comparisons test. \*p <0.05, \*\*p<0.01, \*\*\*p<0.001, \*\*\*\*p<0.0001 compared to WT. n = 1-4 sex/treatment

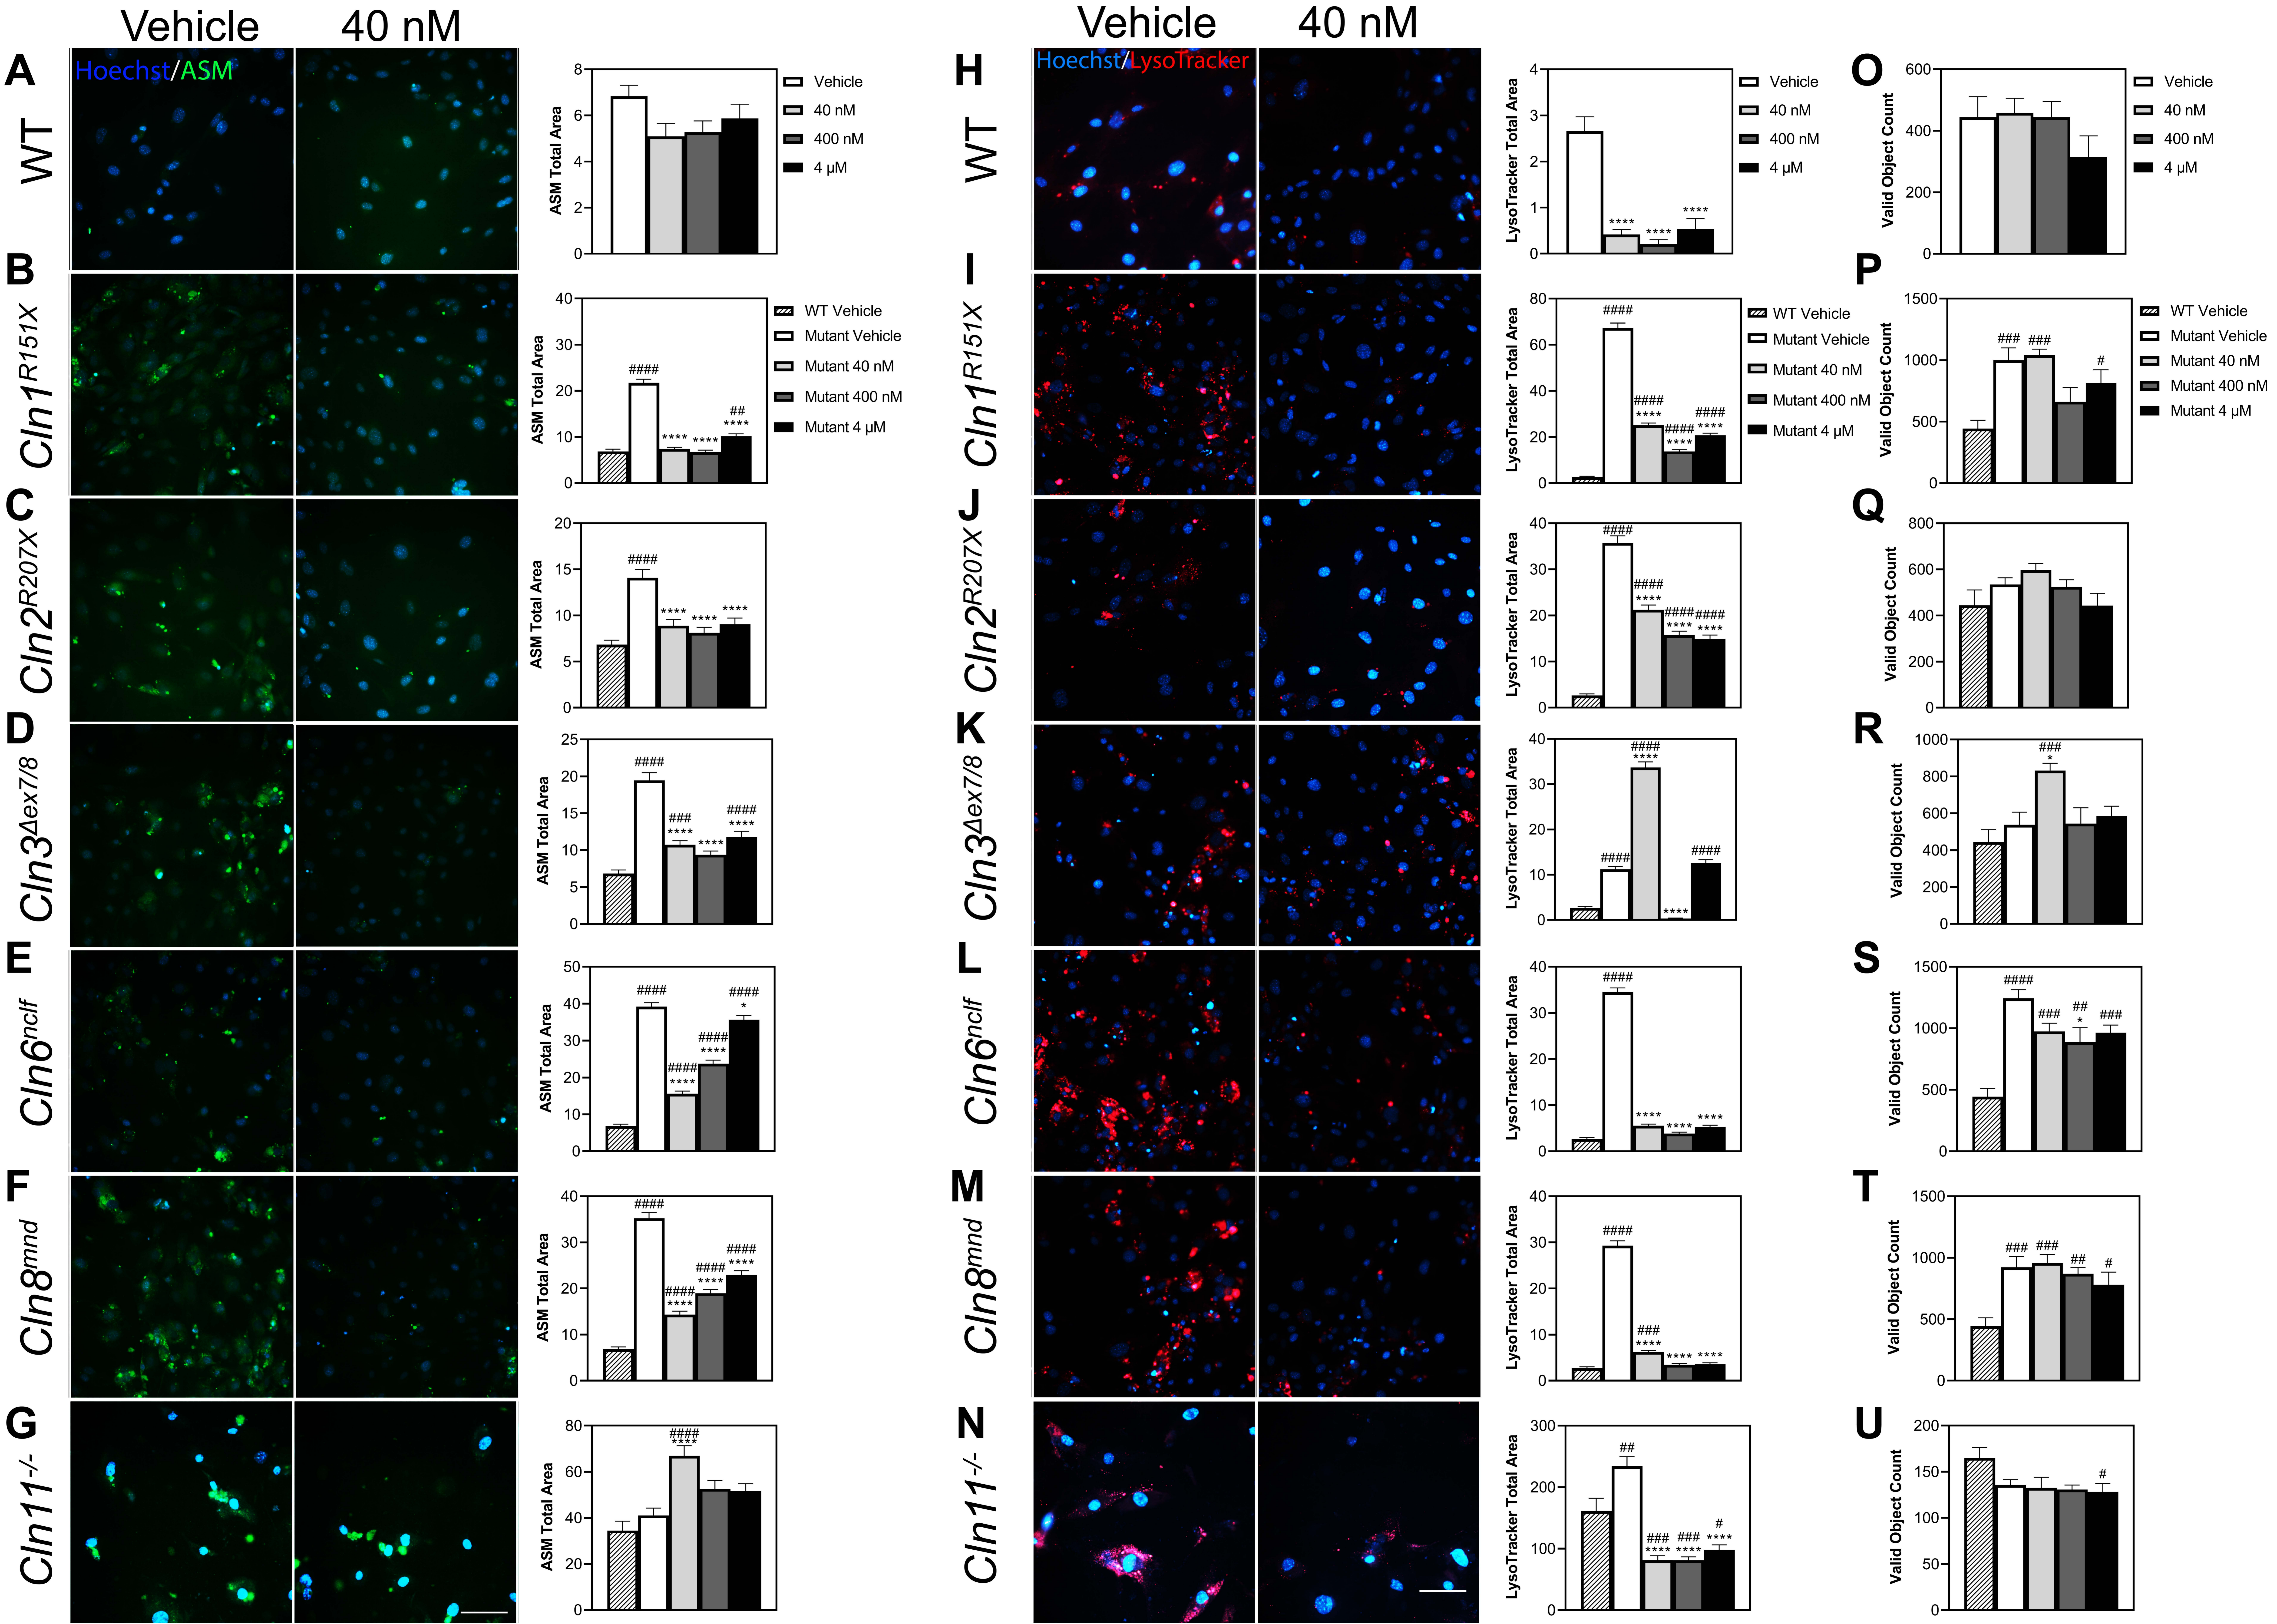

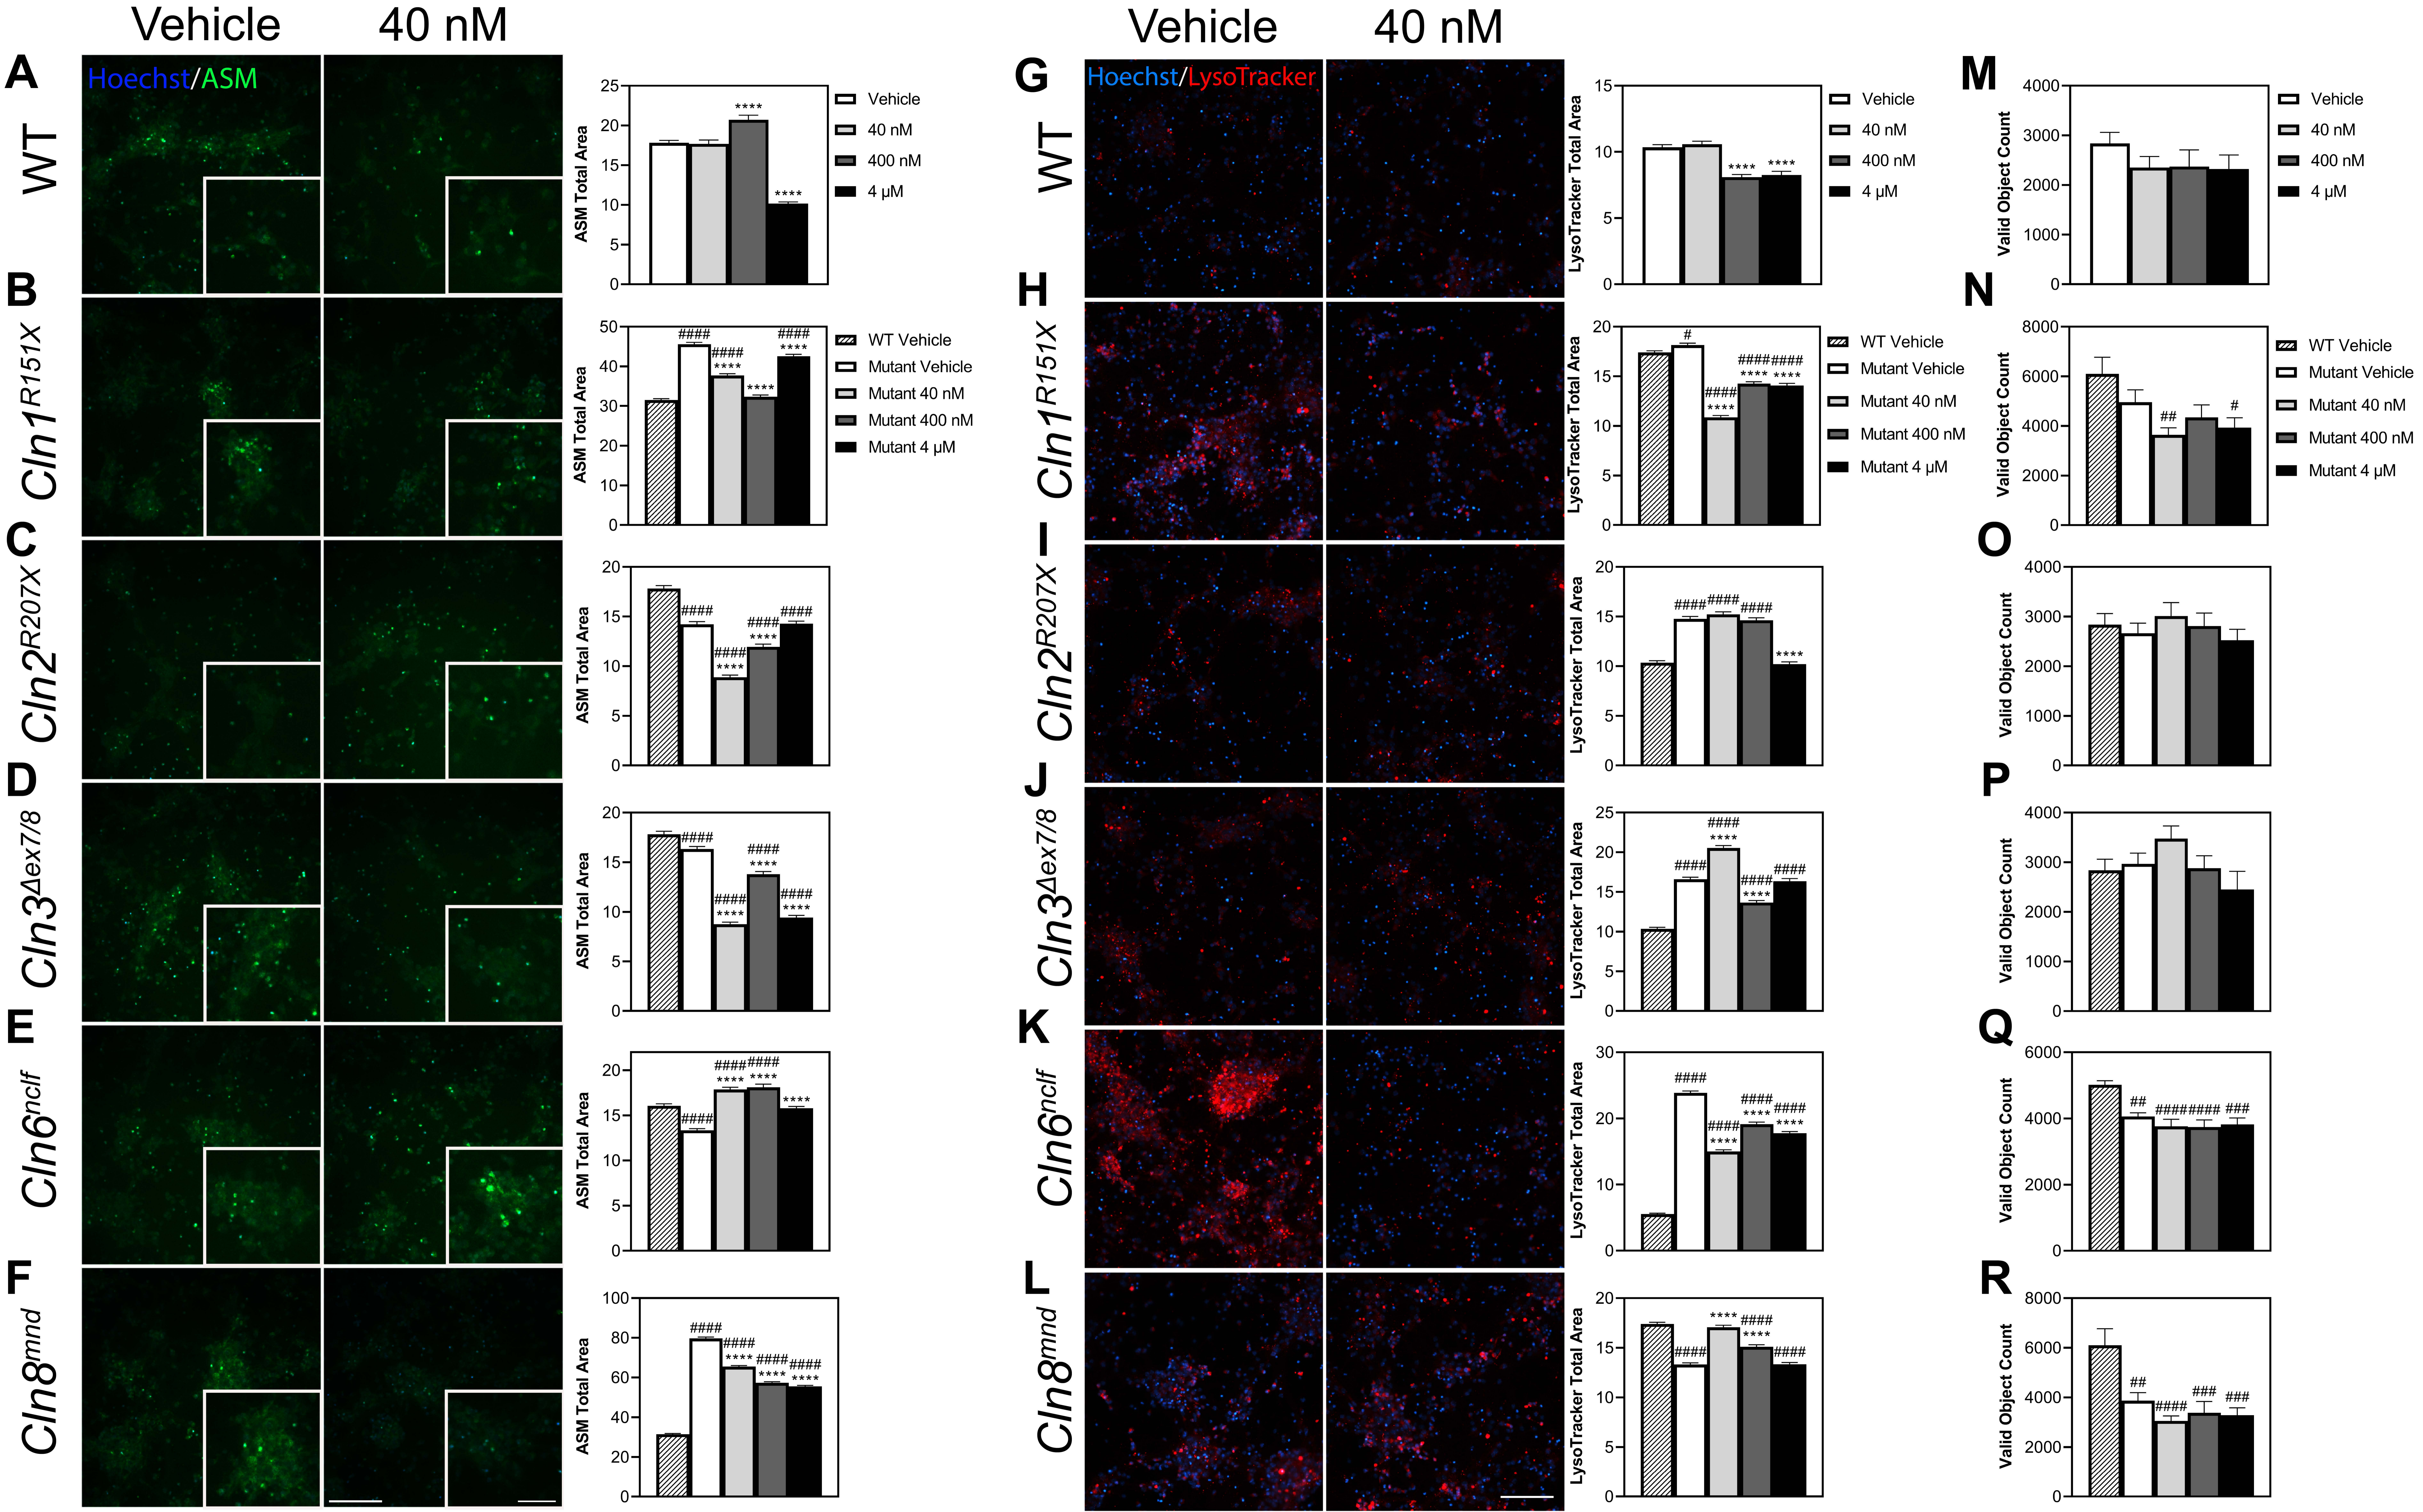

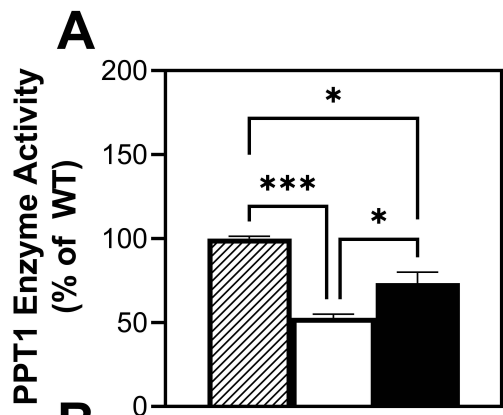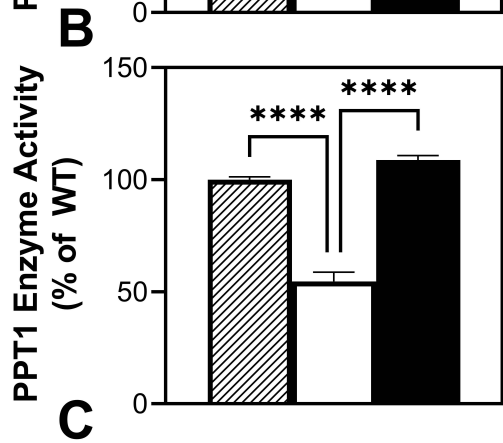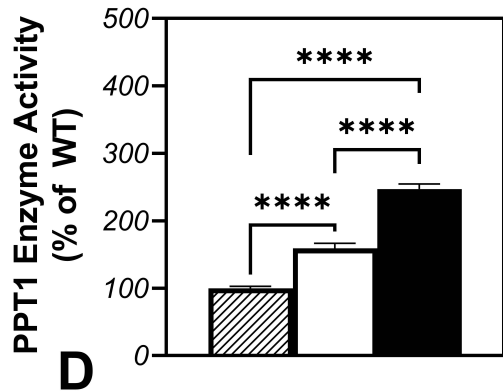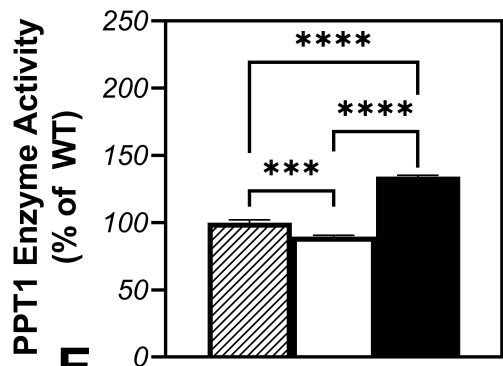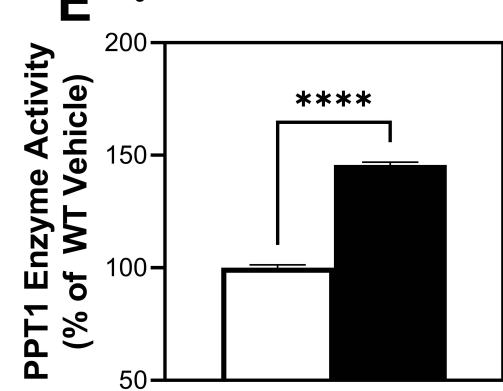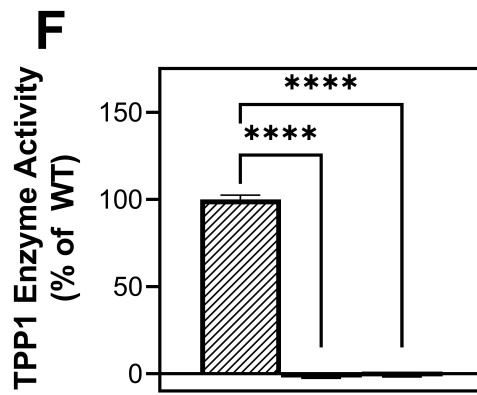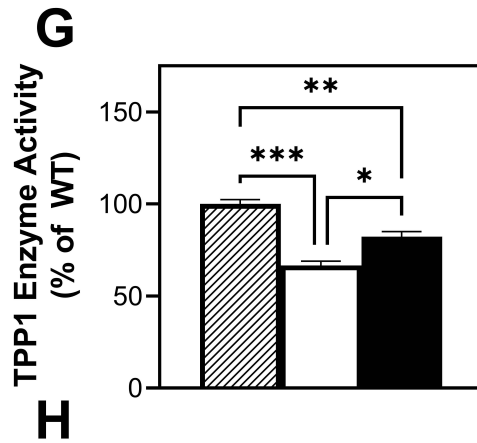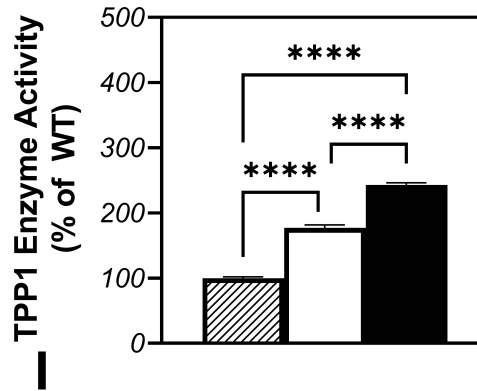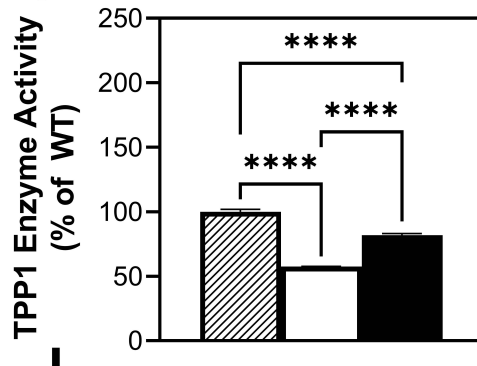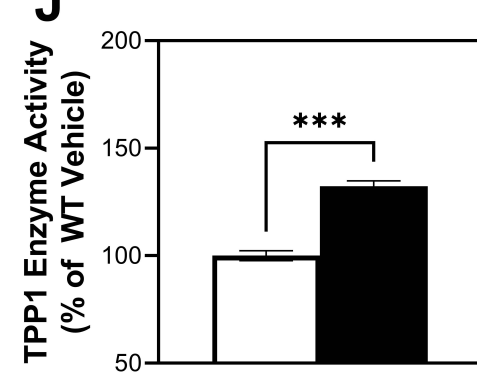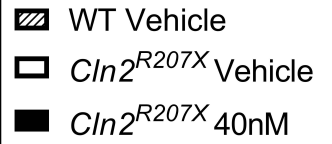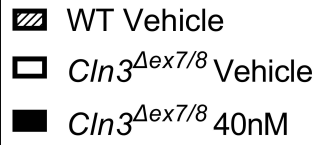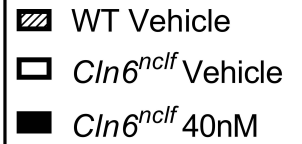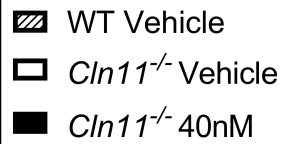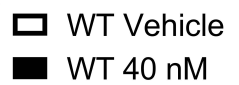

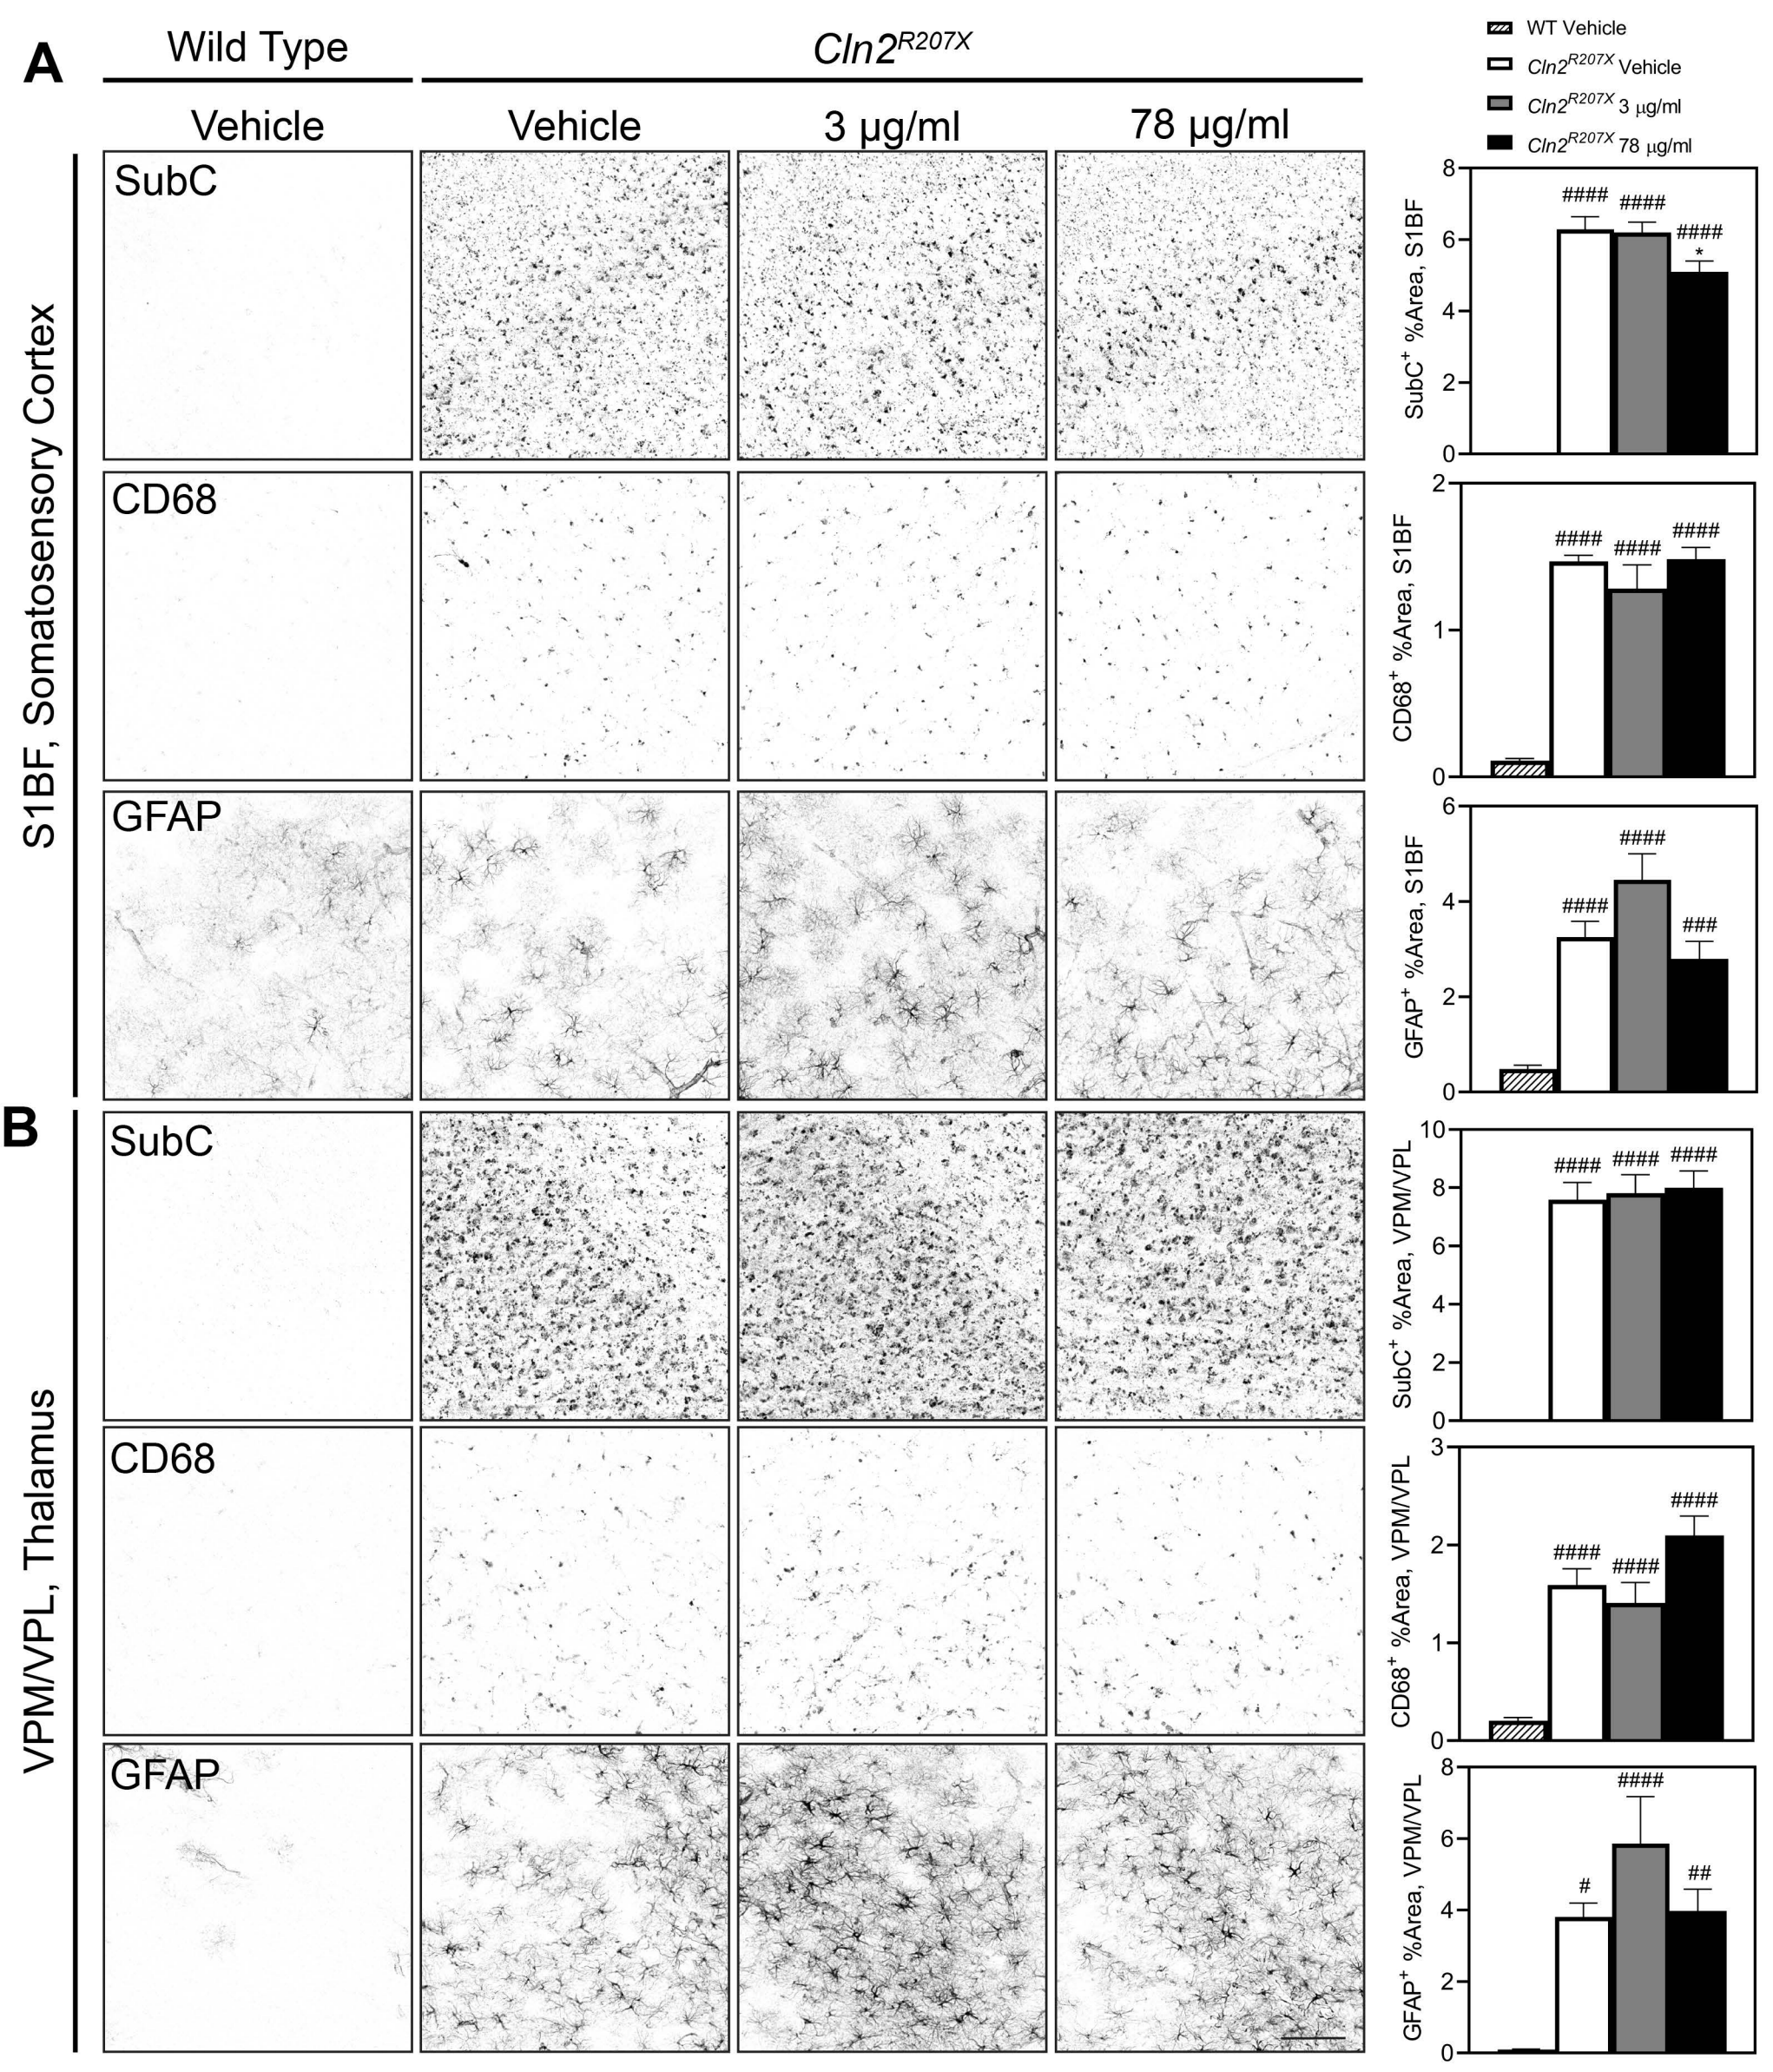



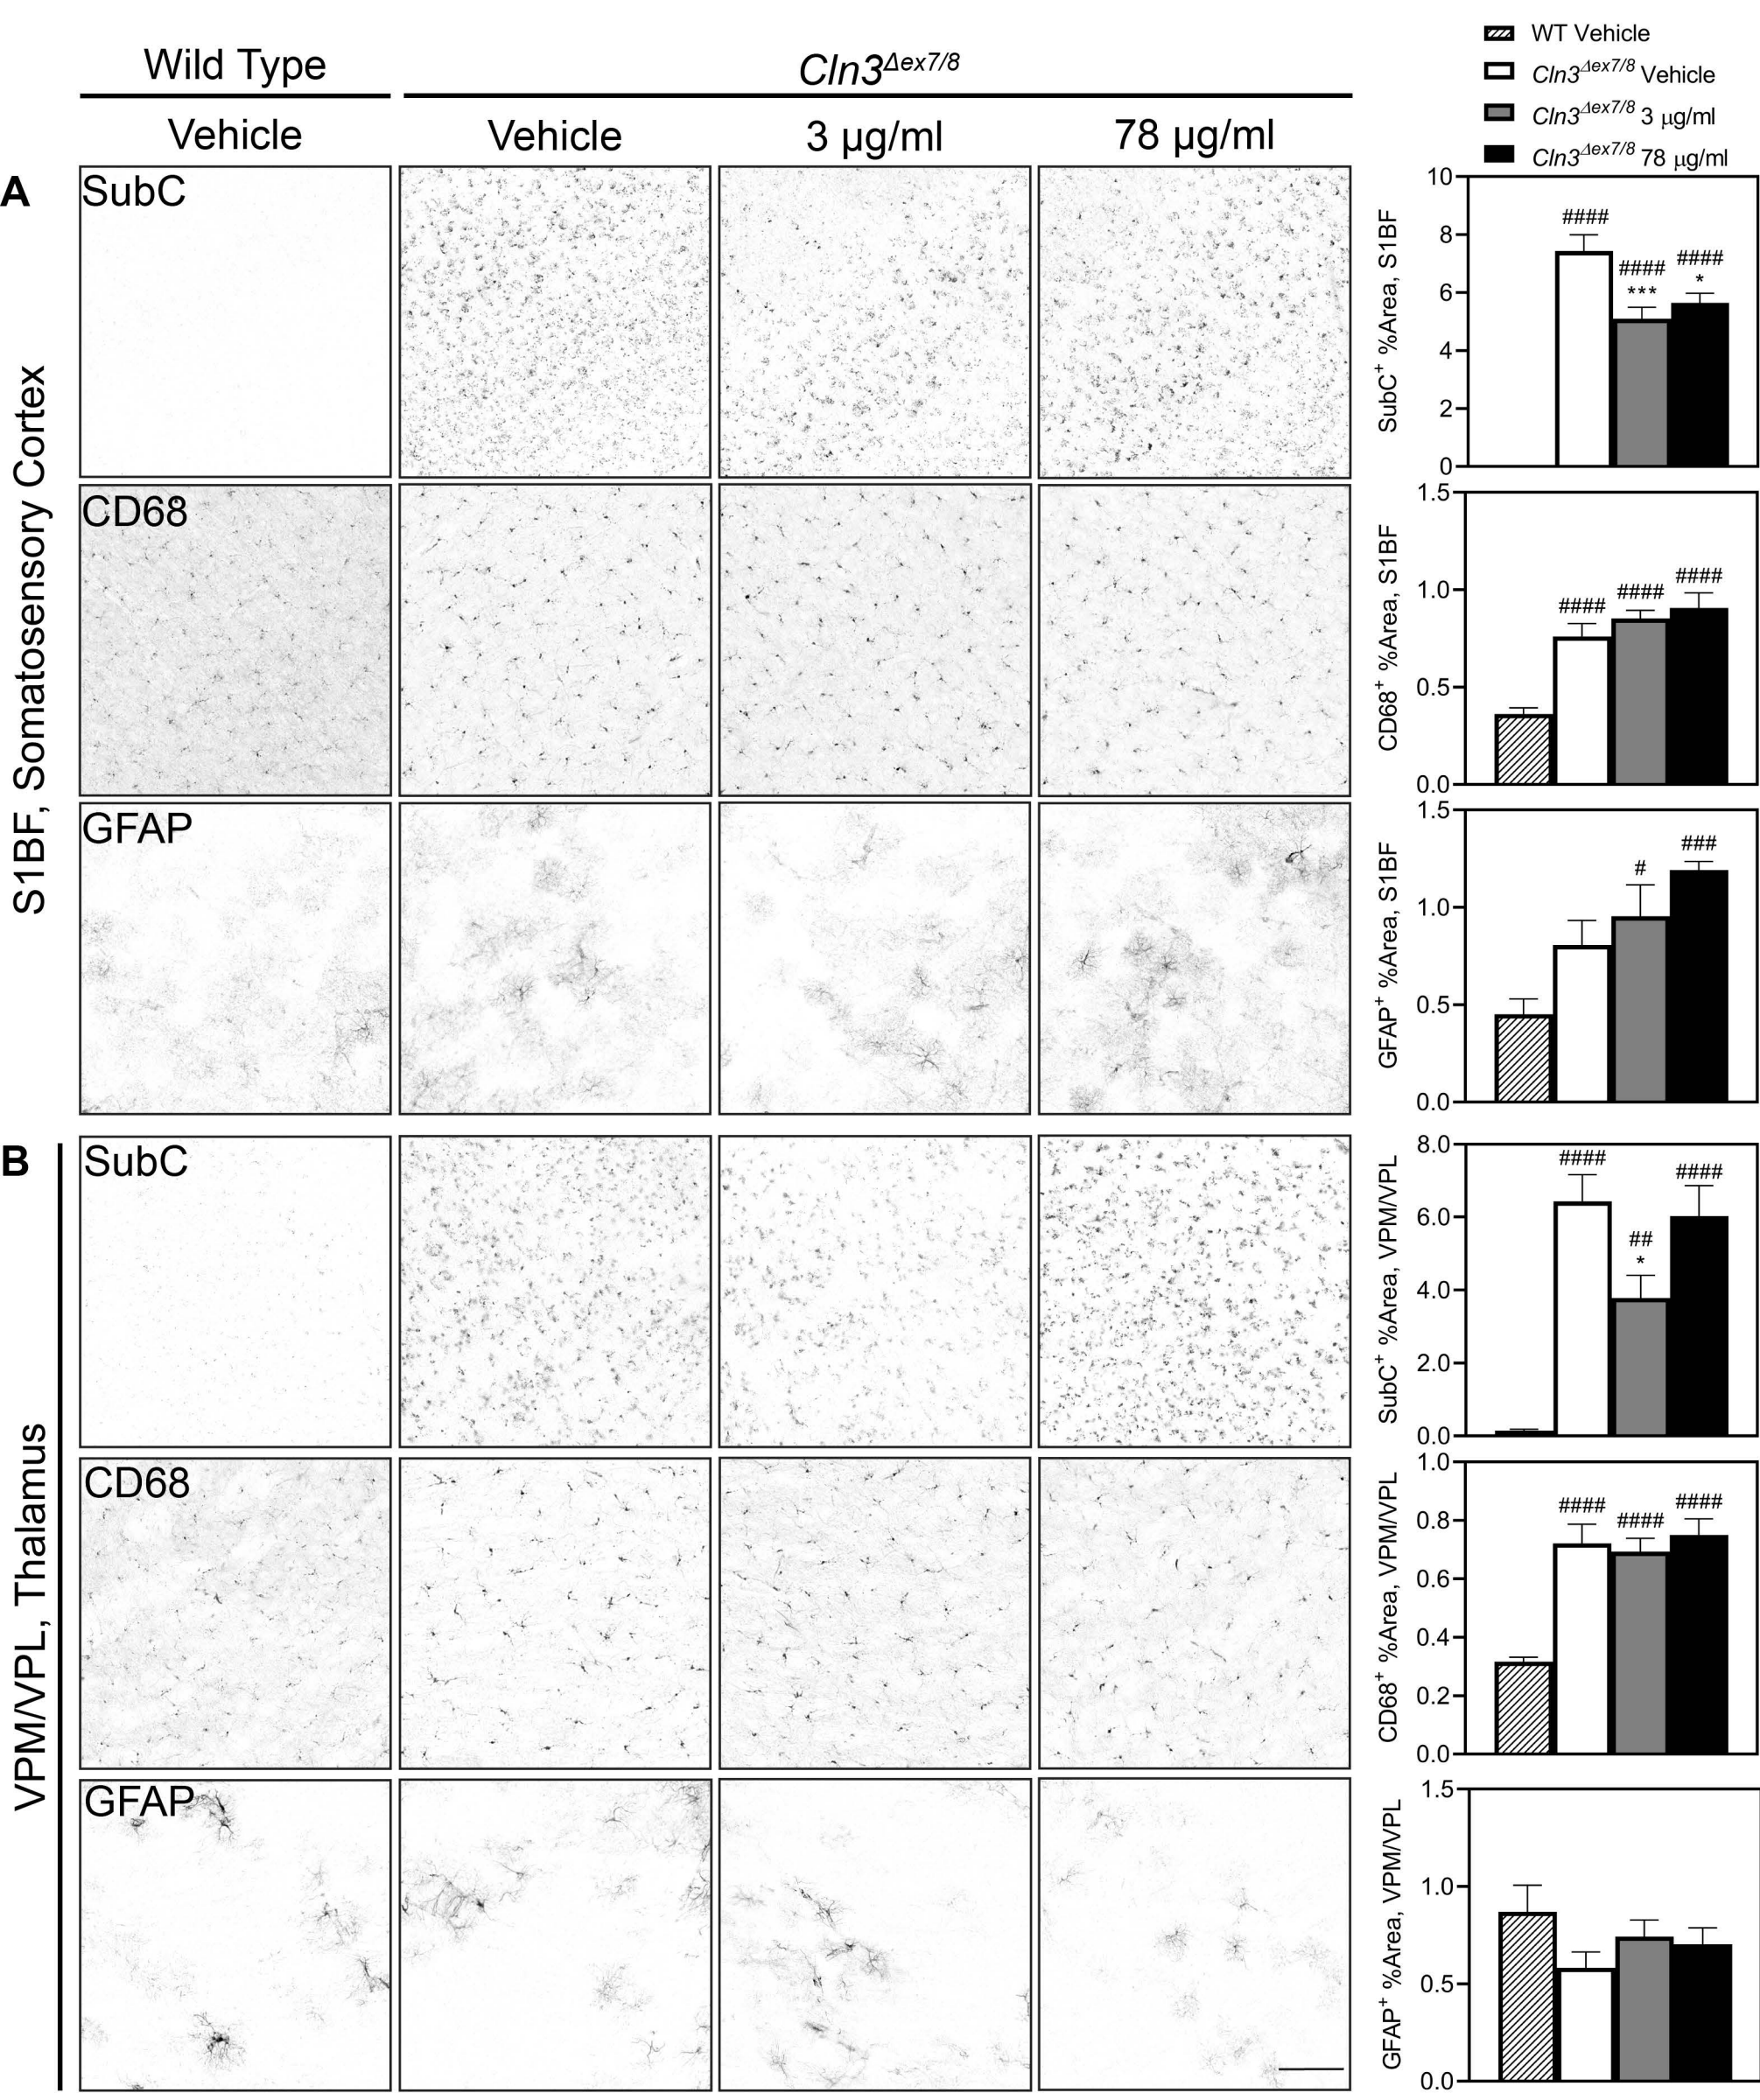

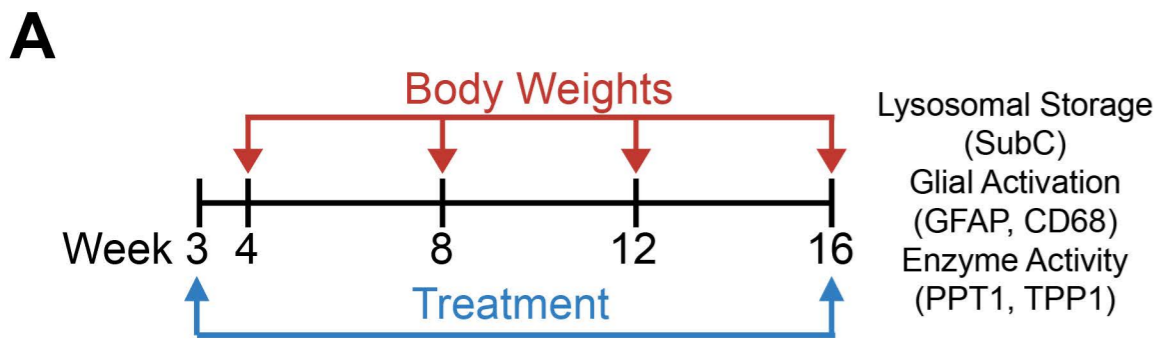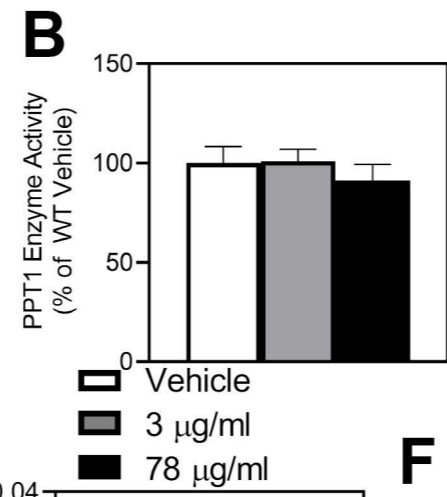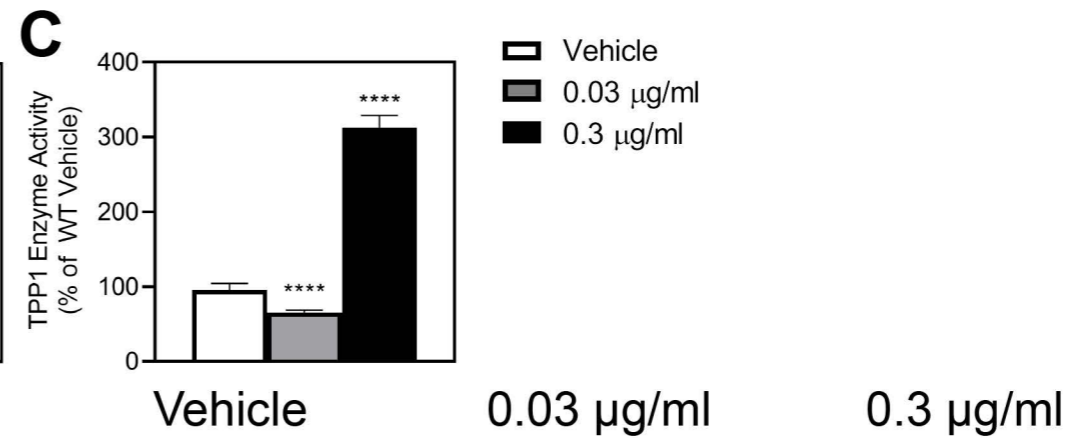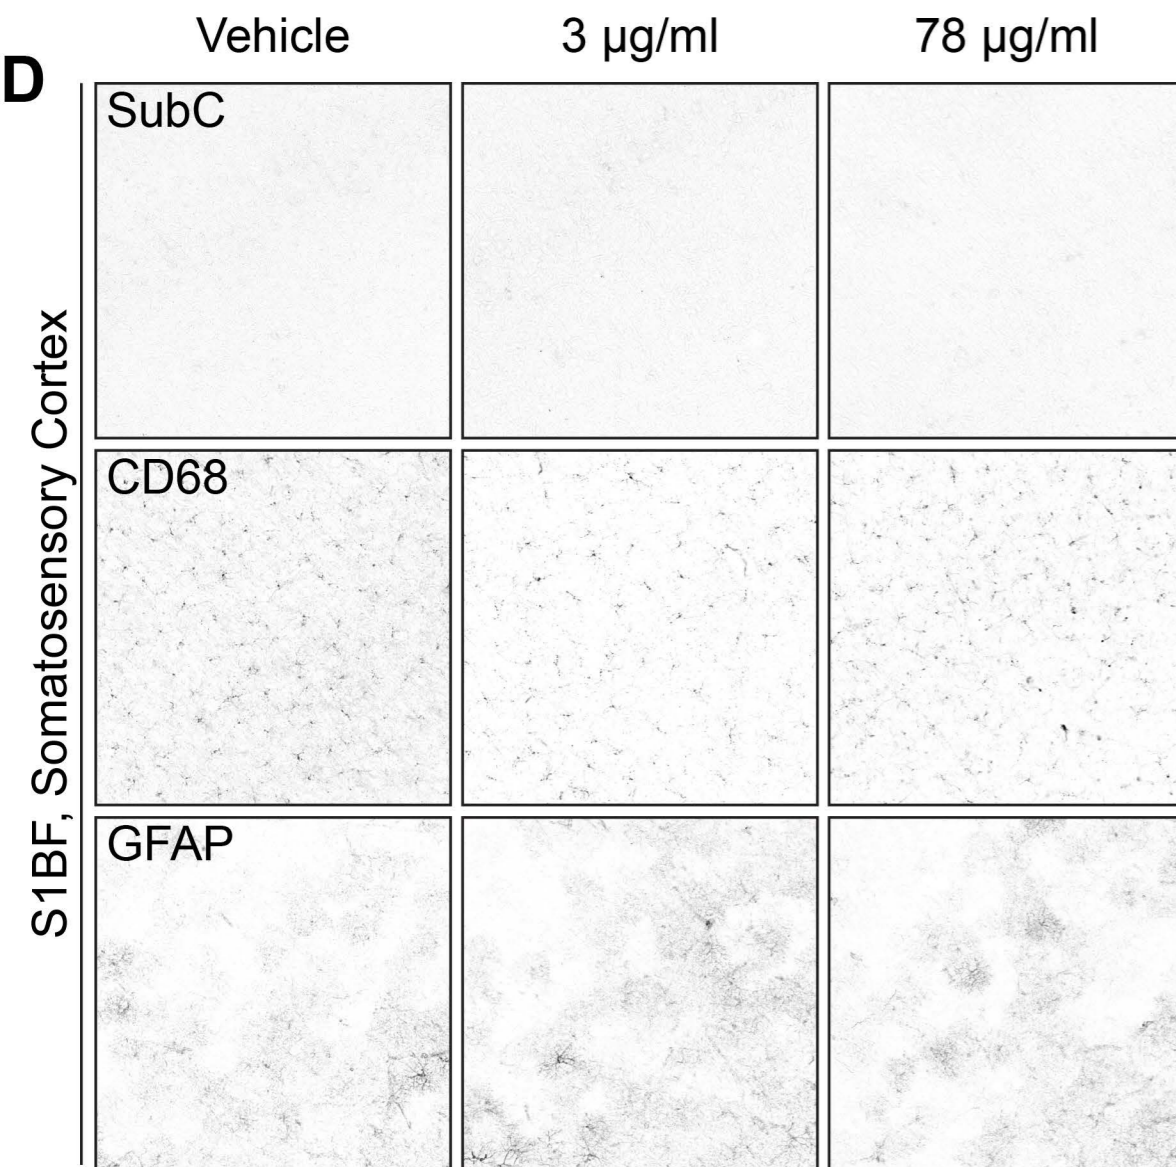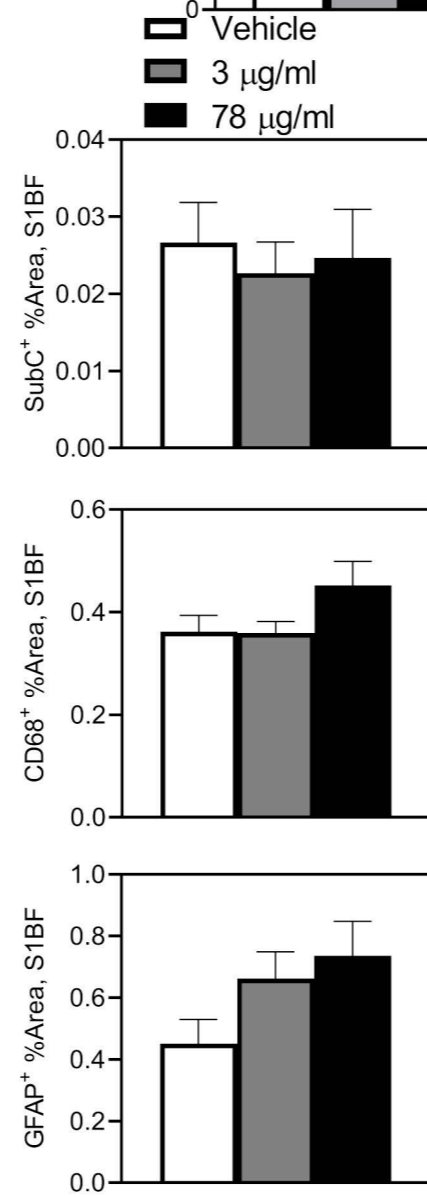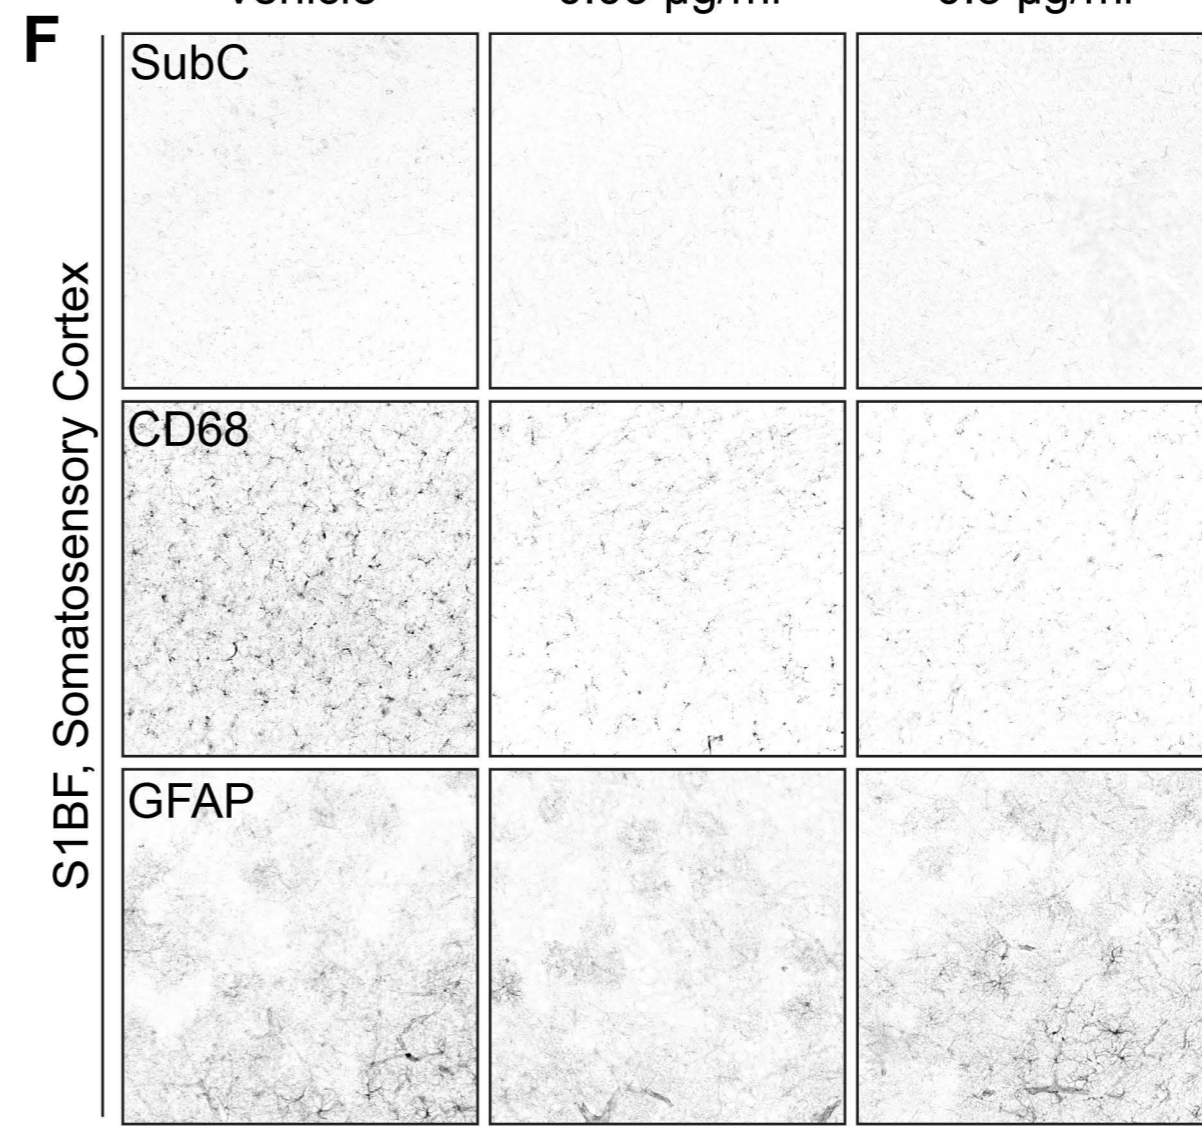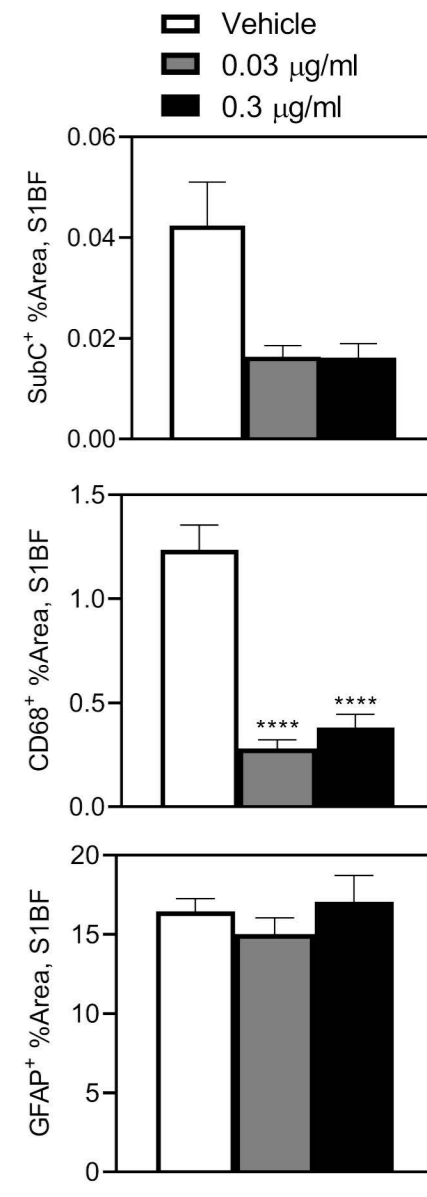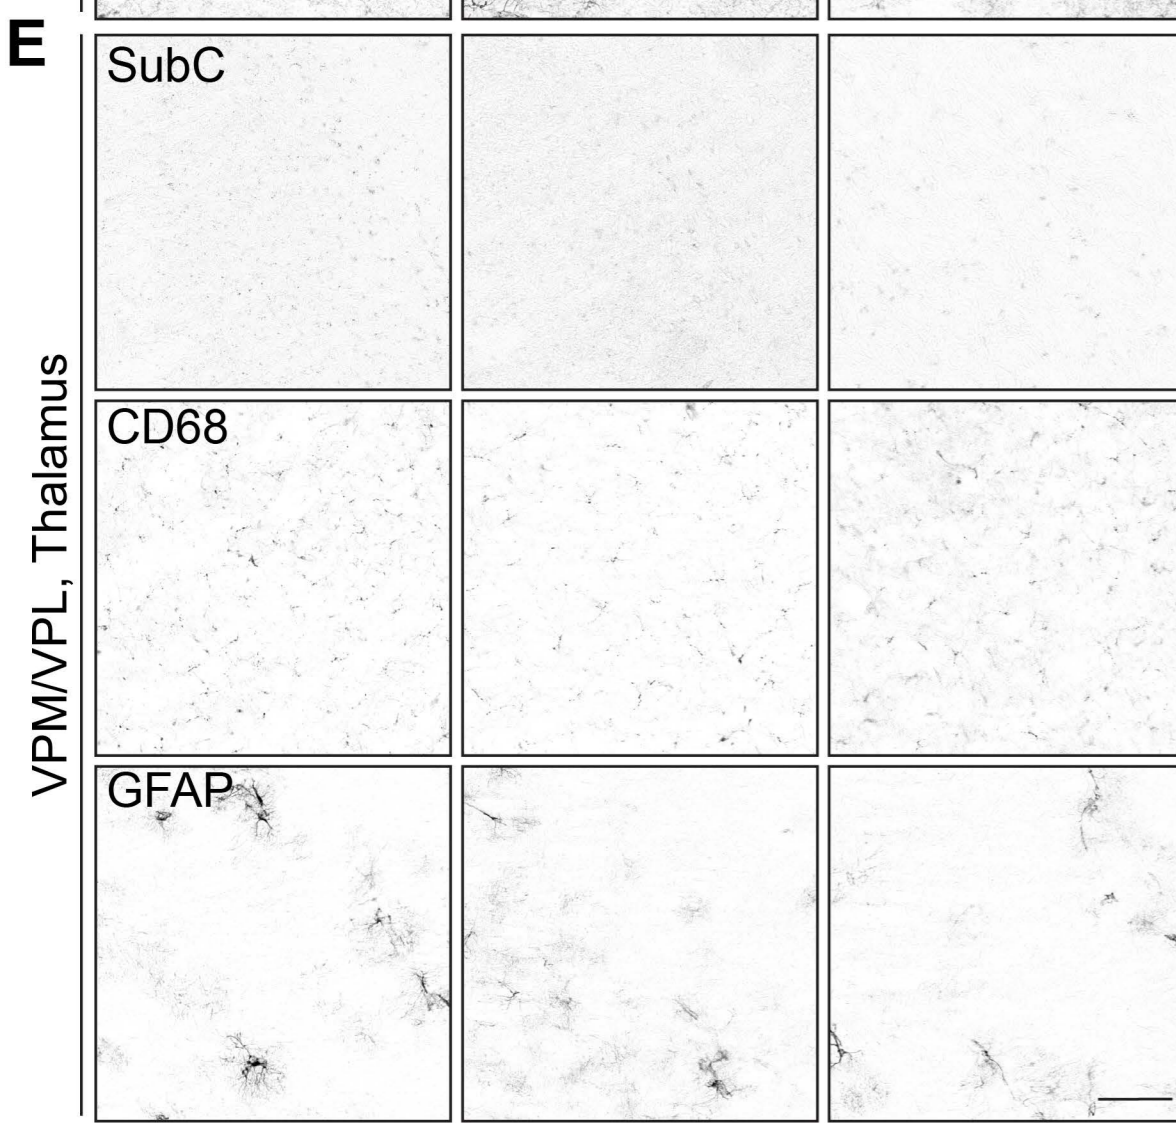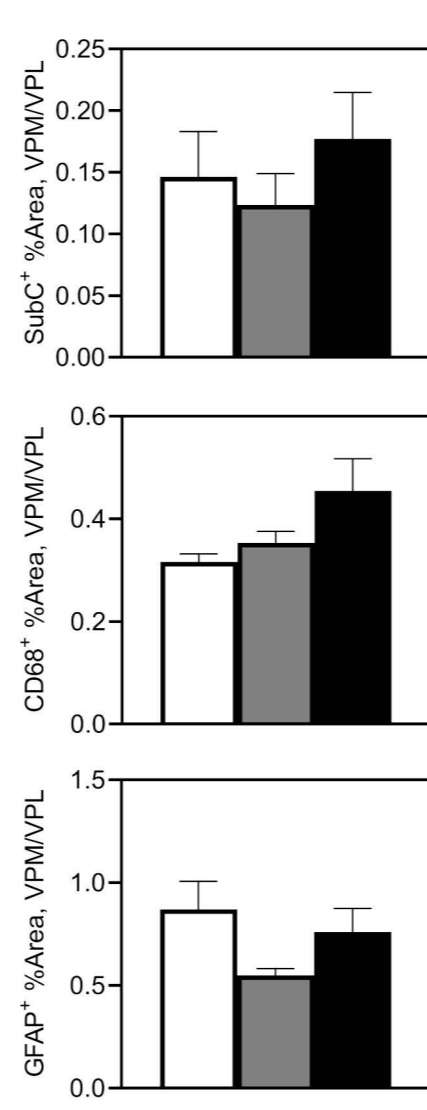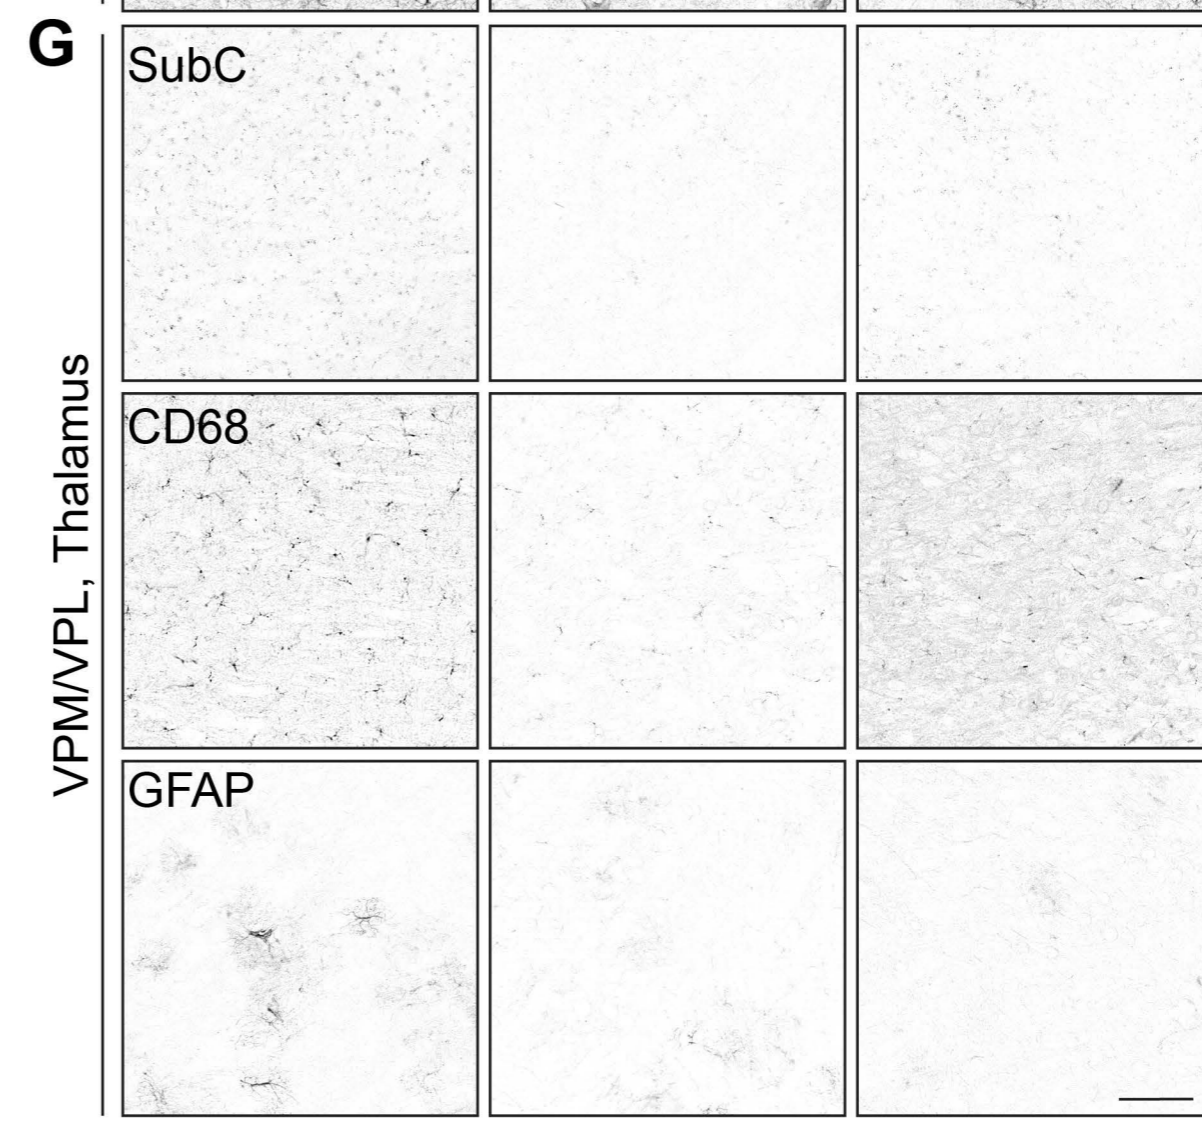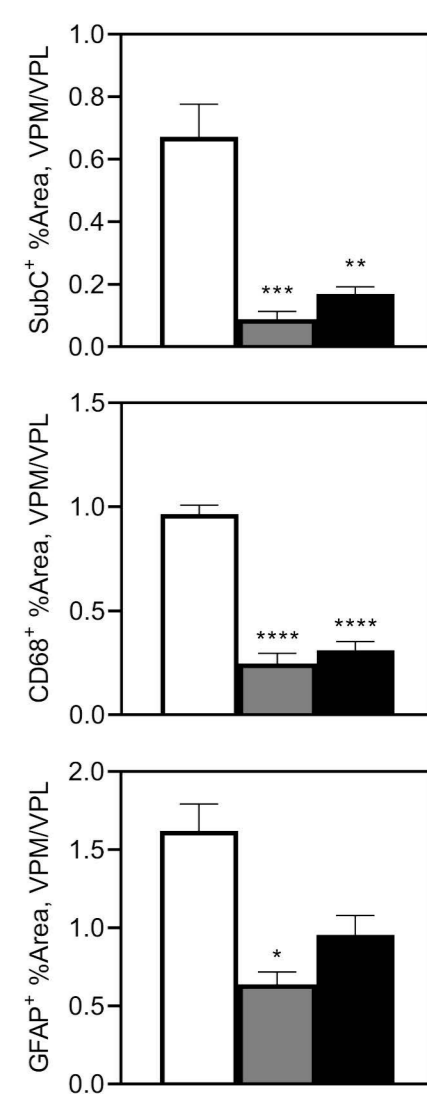

# Male

# Female

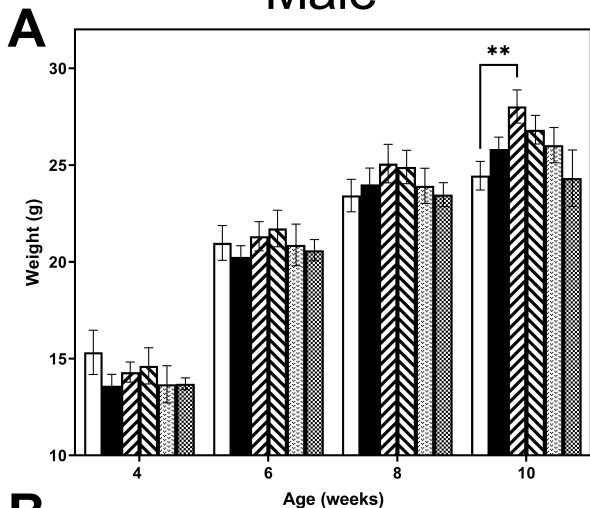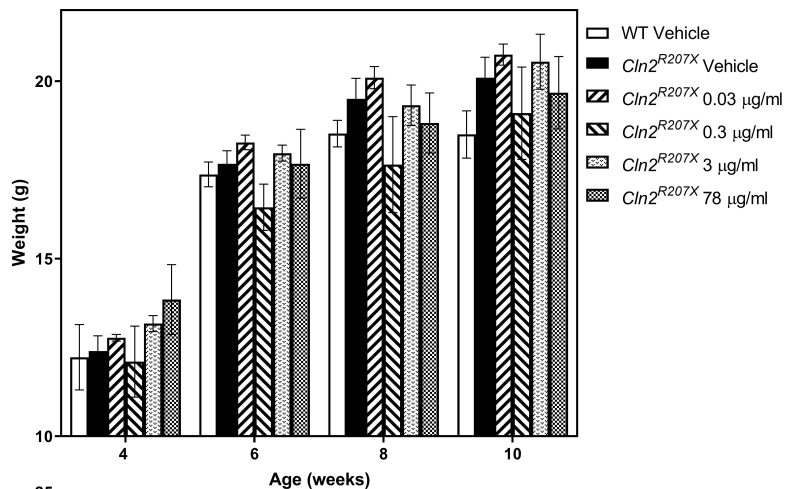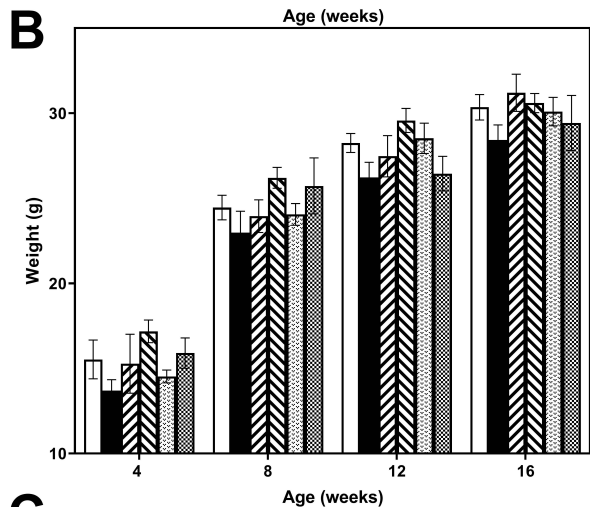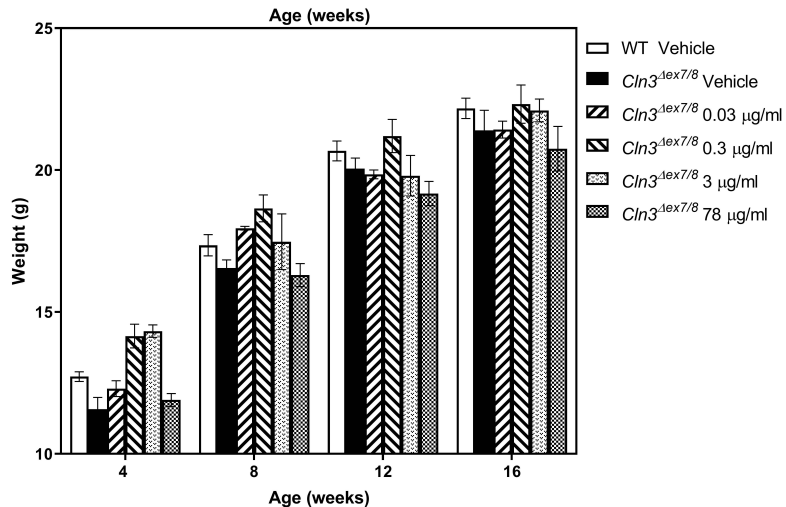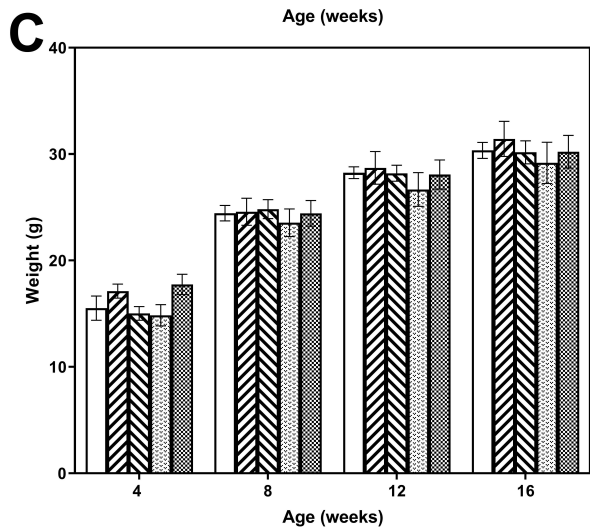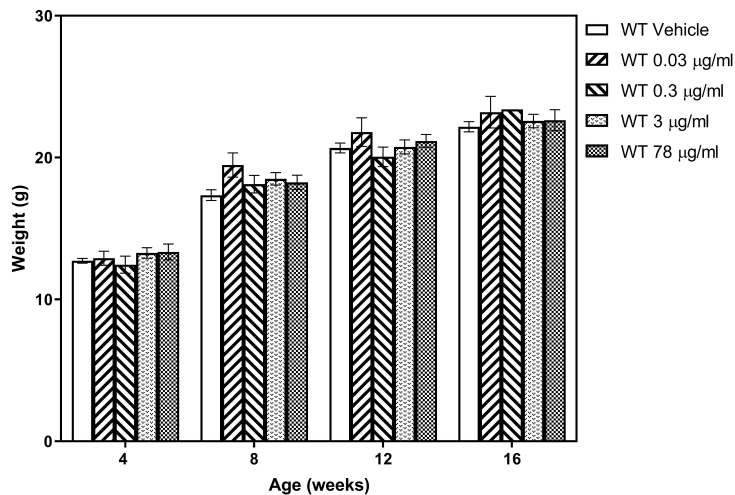

Supplement: media-1.pdf [file media-1.pdf]
